# Supplementary material
Source: Springer Nature journal article supplement (http://www.springermedizin.de/resource/supplementary/12937_2009_232_MOESM1_ESM.pdf/25654678)

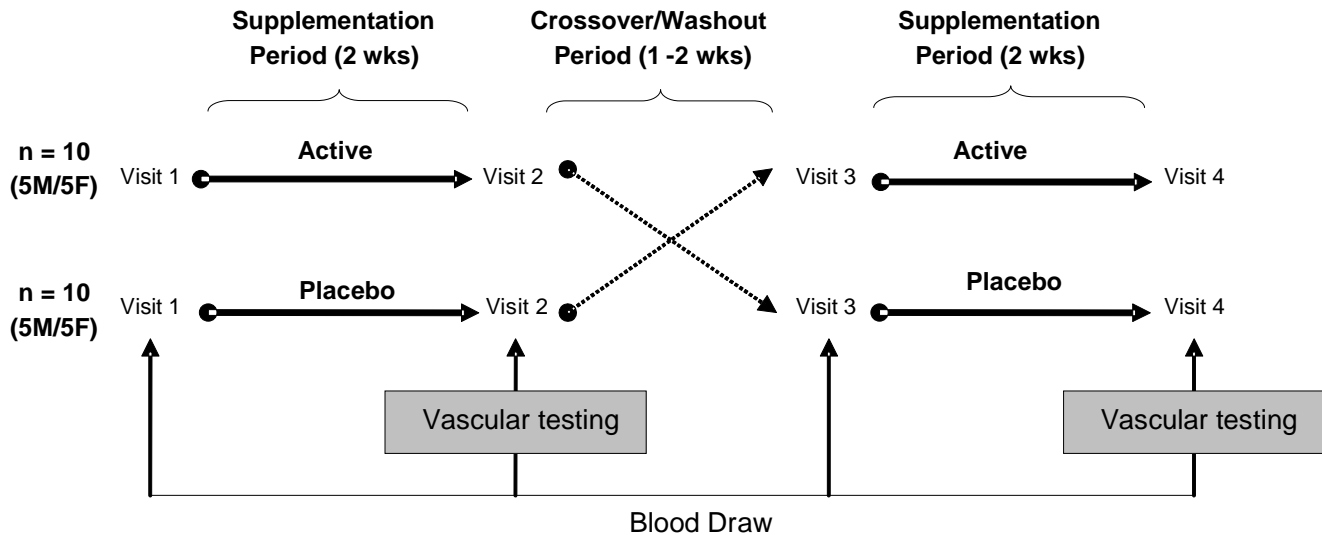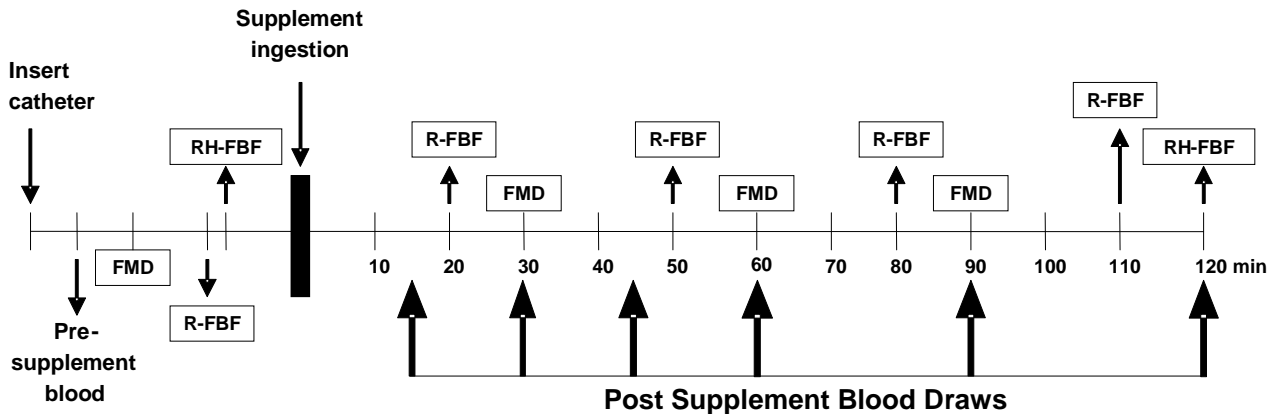

Supplement: MOESM1 [file 25654678]
